# Supplementary material
Source: publisher figshare collection journal article supplement (https://frontiersin.figshare.com/ndownloader/files/24950381)

Supplementary figure S1. Plots of residuals against change in log Sparrowhawk indices. Note that site-level modelling produces a high frequency of change indices (i.e.  $\ln((P[i,t]+1)/(P[i,1]+1))$ ) at values of zero ( $=\ln(1)$ , generally where the predator is absent from the site or ever present) and  $\pm 0.693$  ( $=\ln(2)$  or  $\ln(1/2)$ ), indicating a change in the value of  $P[i,t]$  from 0 to 1 or 1 to 0).

**Grey Partridge**

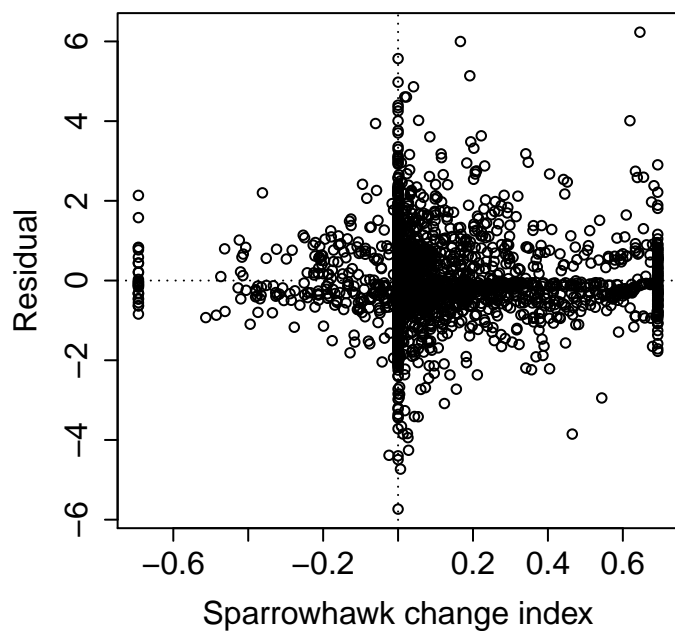

**Lapwing**

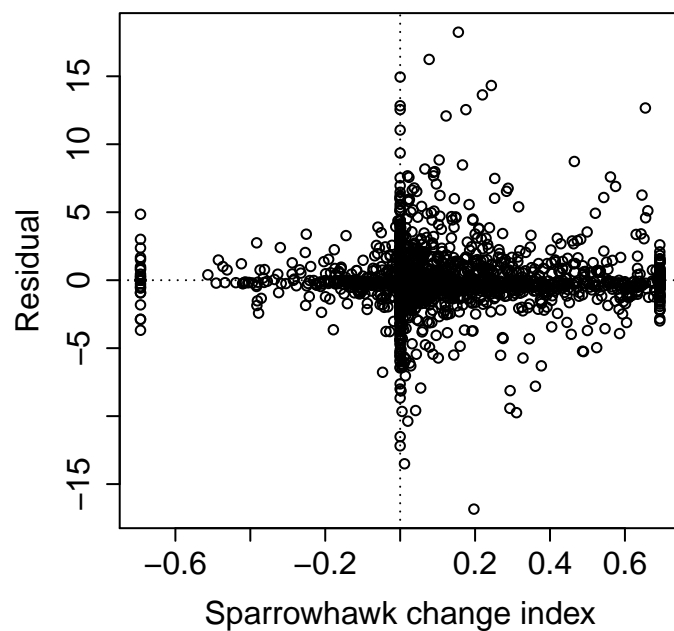

**Turtle Dove**

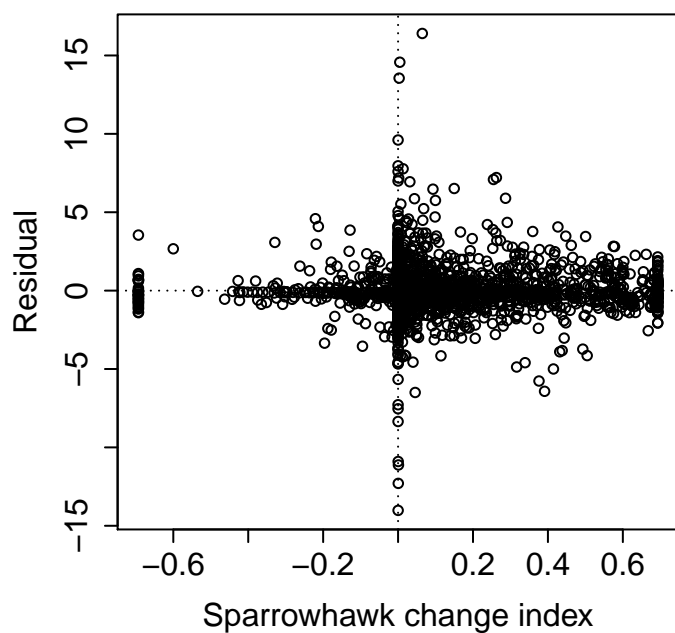

**Blue Tit**

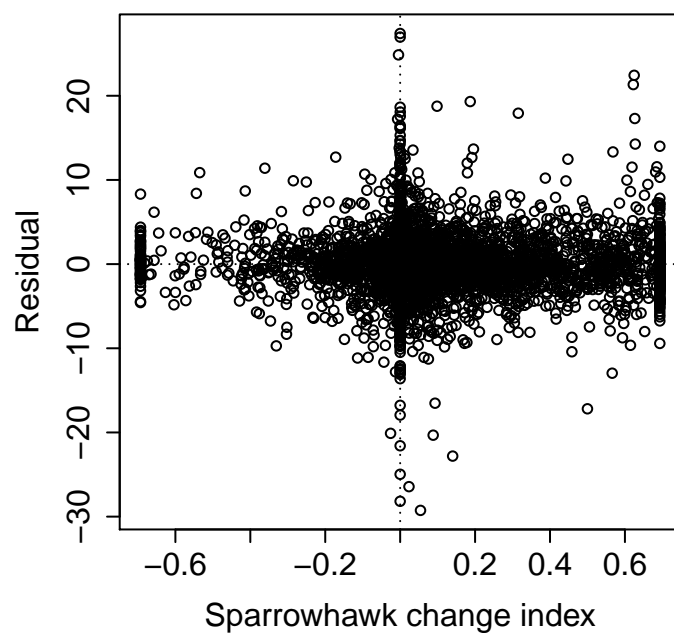

**Great Tit**

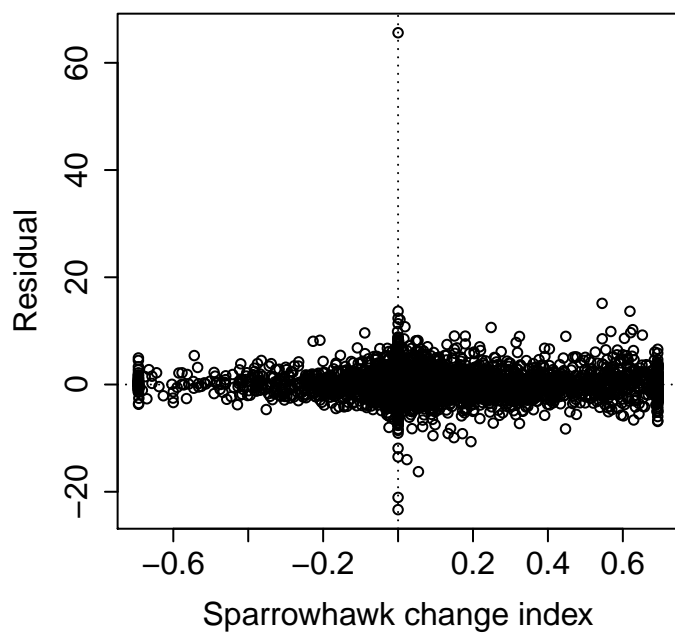

**Coal Tit**

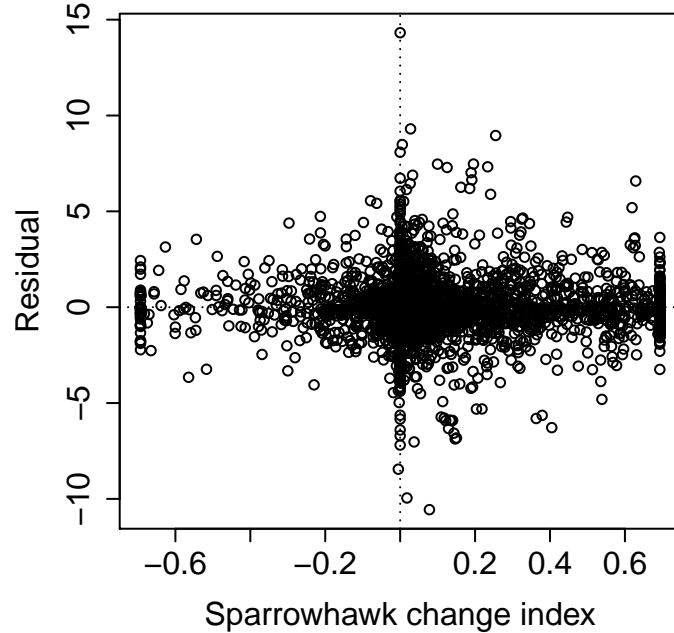

**Willow Tit**

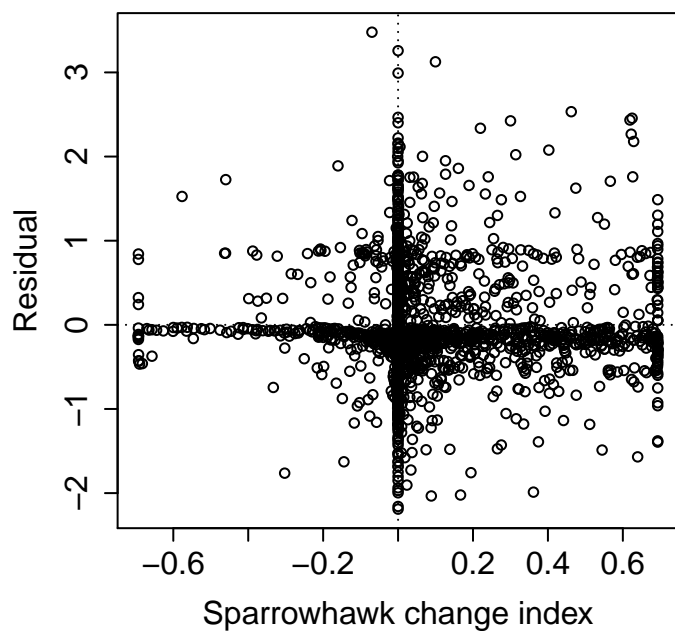

**Marsh Tit**

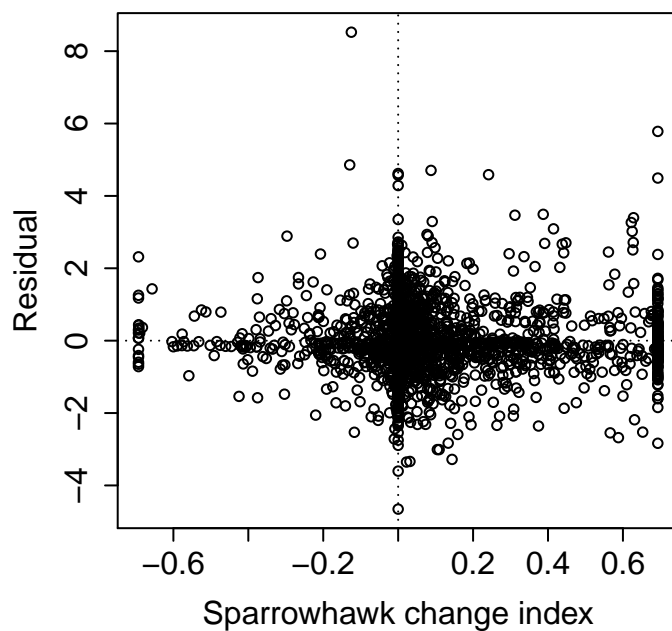

**Skylark**

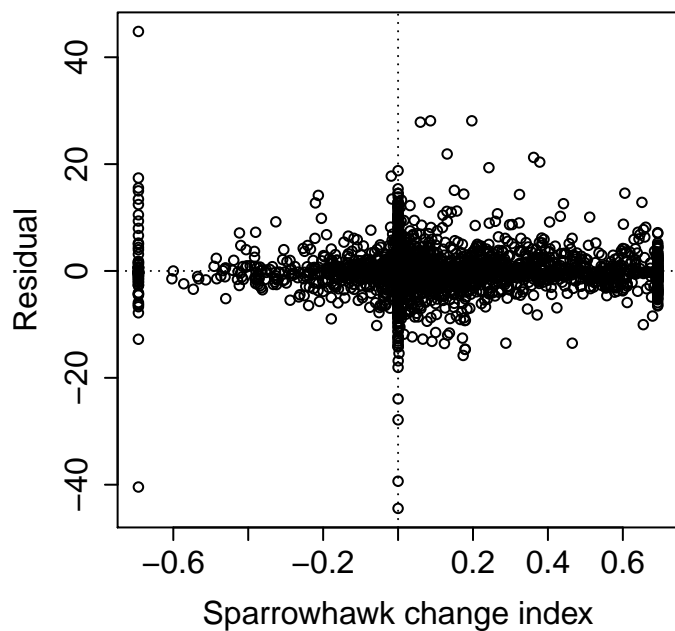

**Long-tailed Tit**

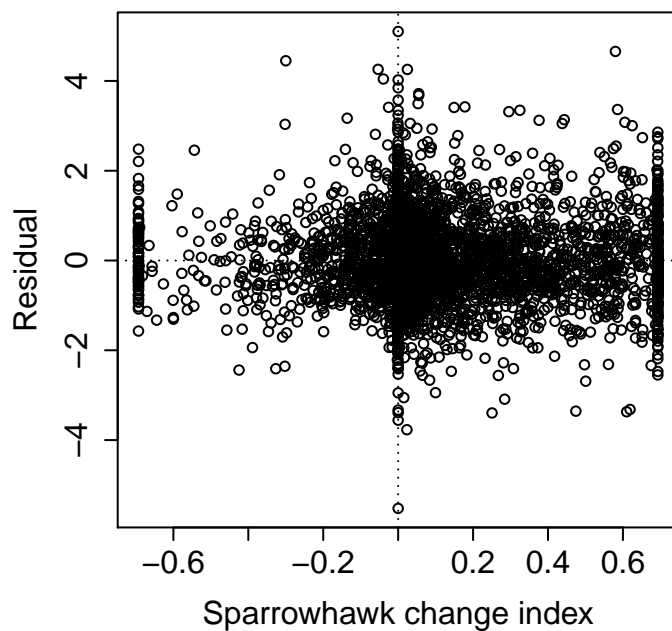

**Wood Warbler**

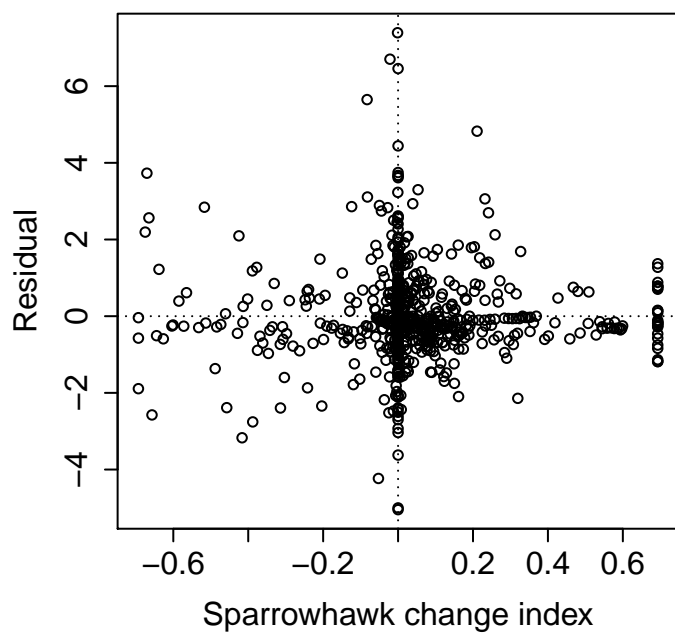

**Chiffchaff**

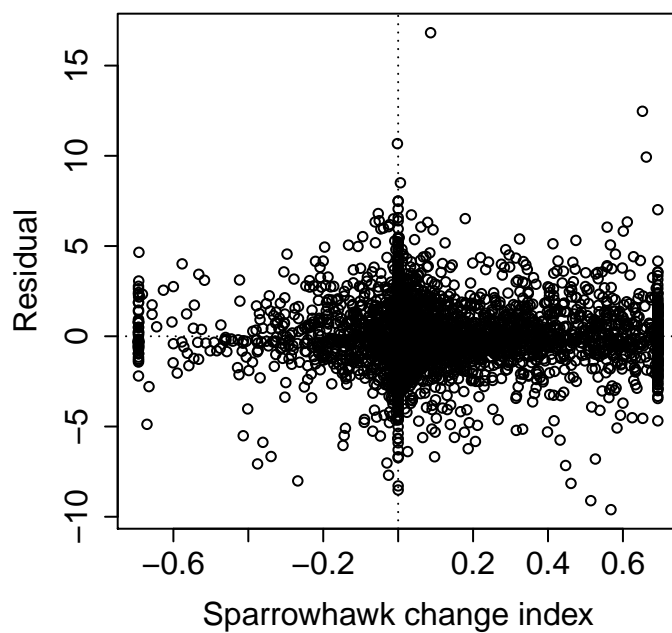

**Willow Warbler**

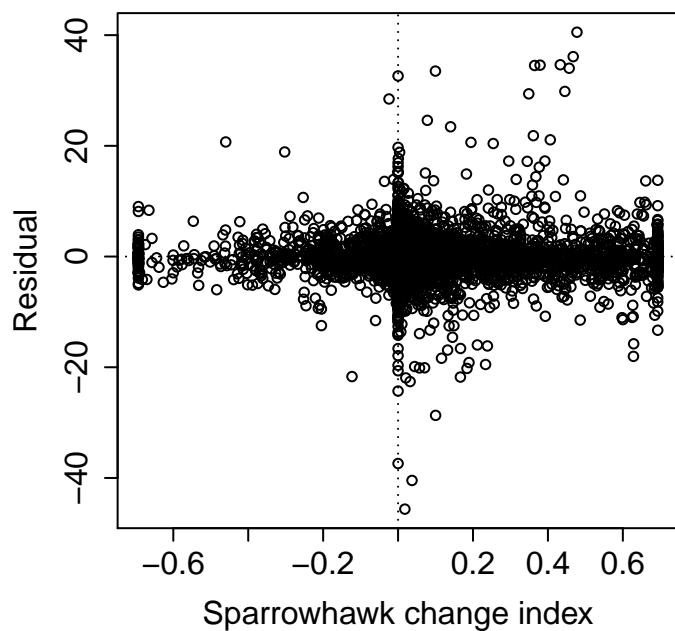

**Whitethroat**

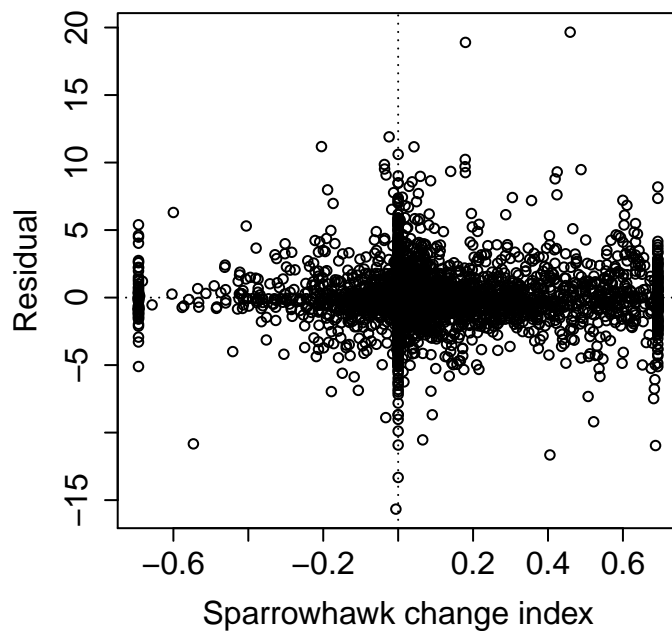

**Nuthatch**

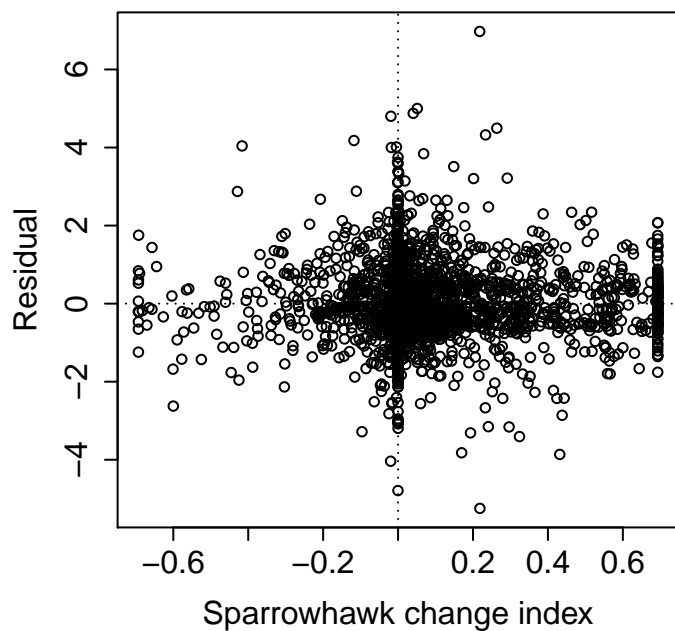

**Treecreeper**

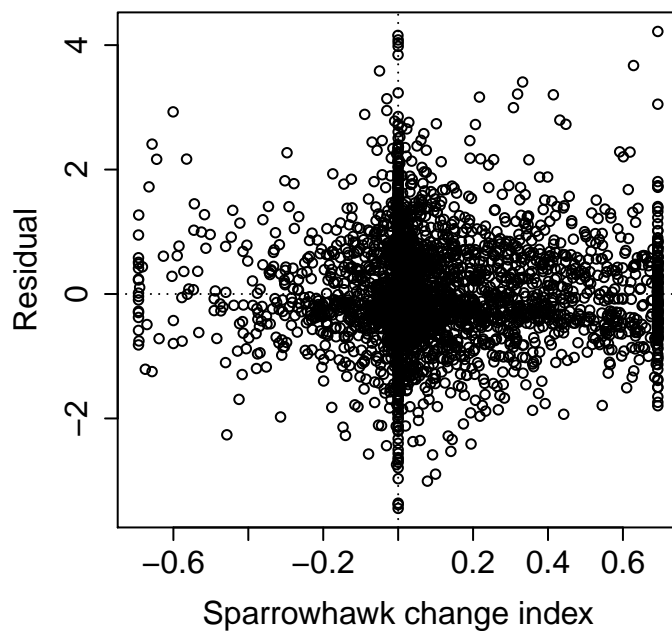

**Wren**

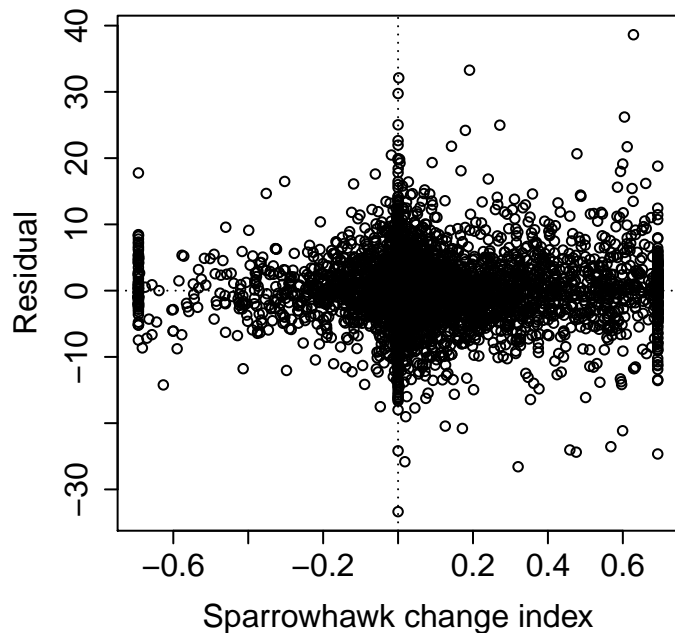

**Starling**

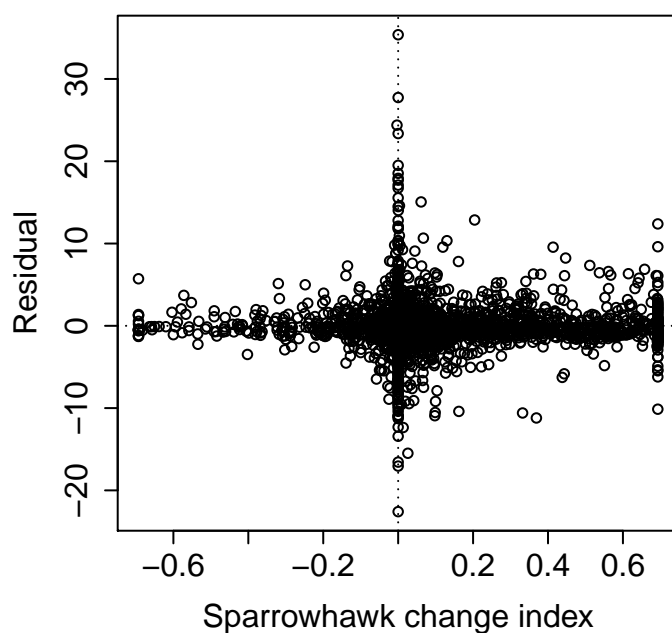

**Blackbird**

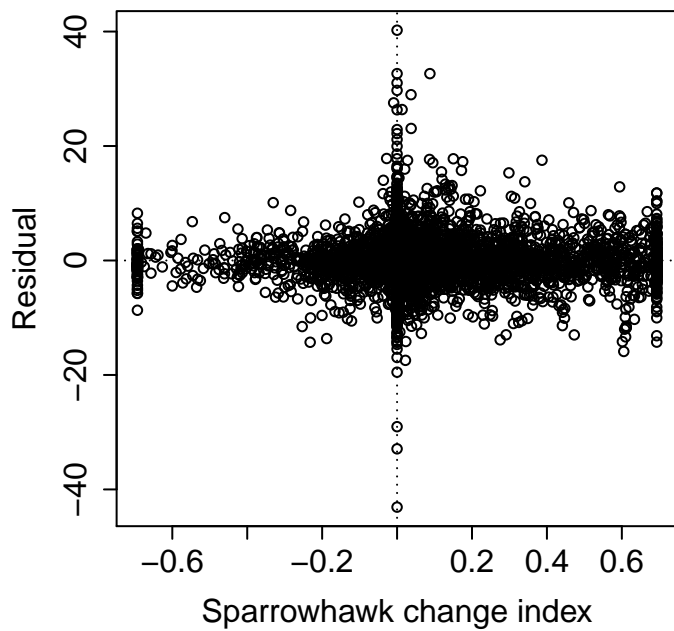

**Song Thrush**

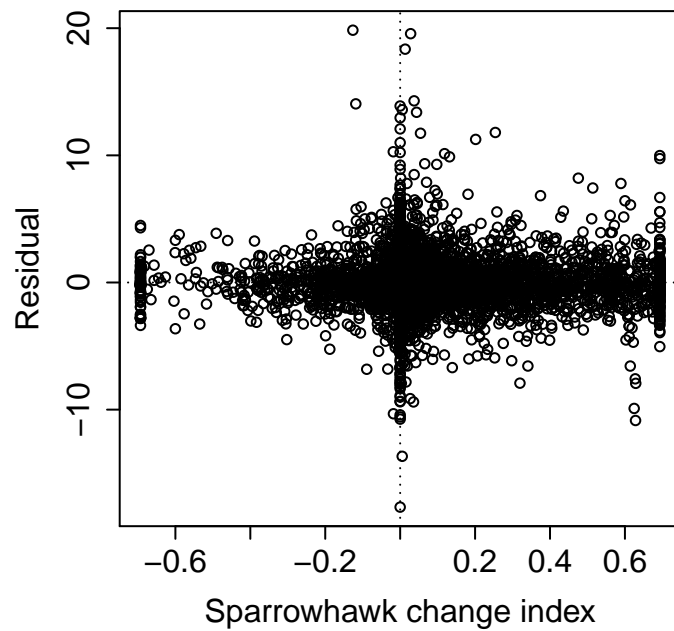

**Mistle Thrush**

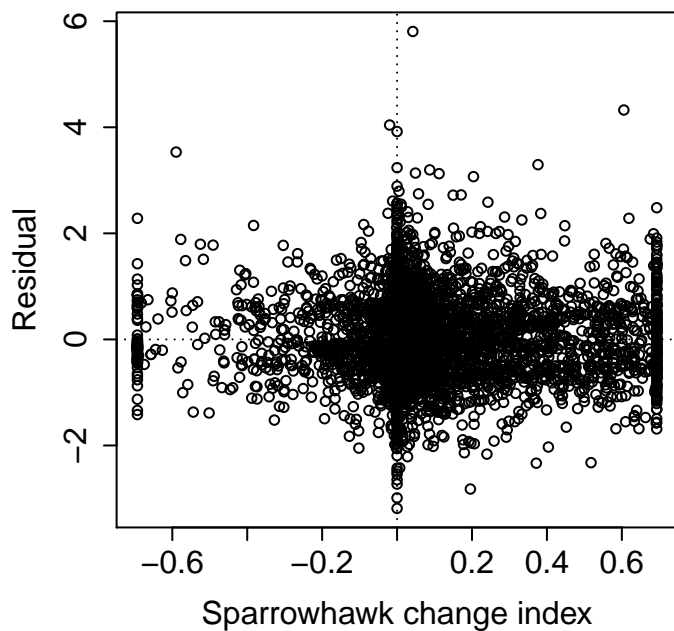

**Spotted Flycatcher**

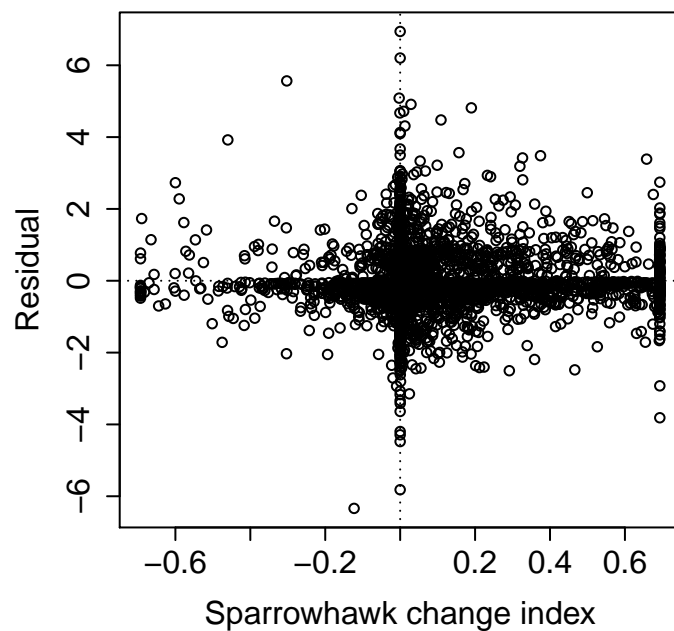

**Robin**

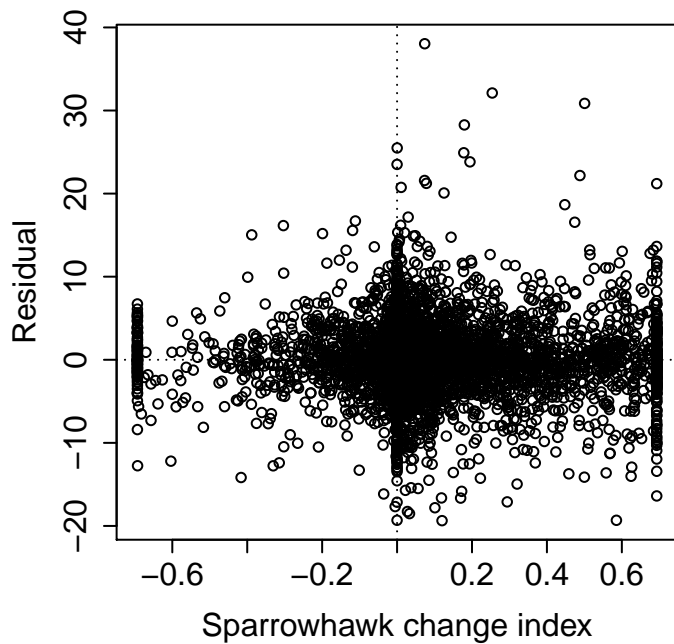

**Dunnock**

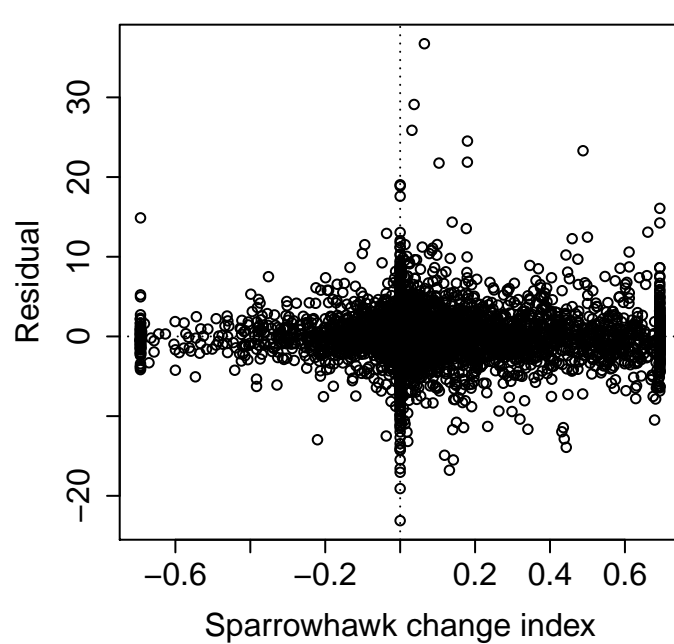

**House Sparrow**

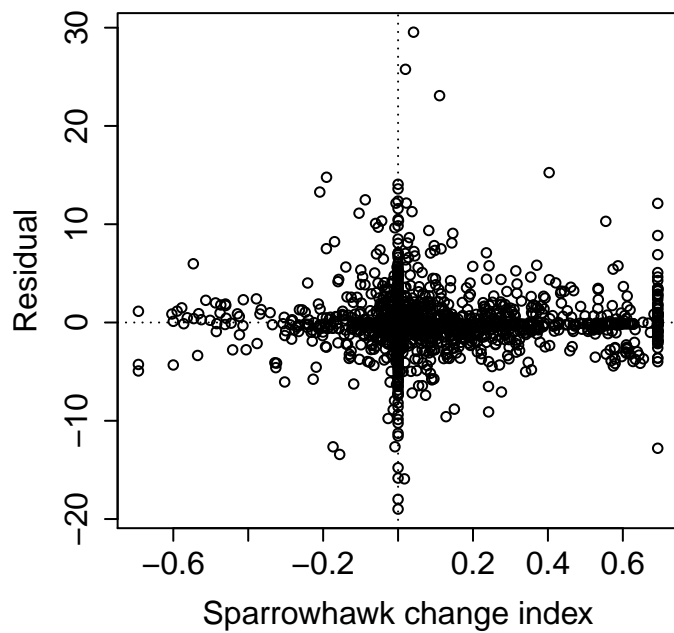

**Tree Sparrow**

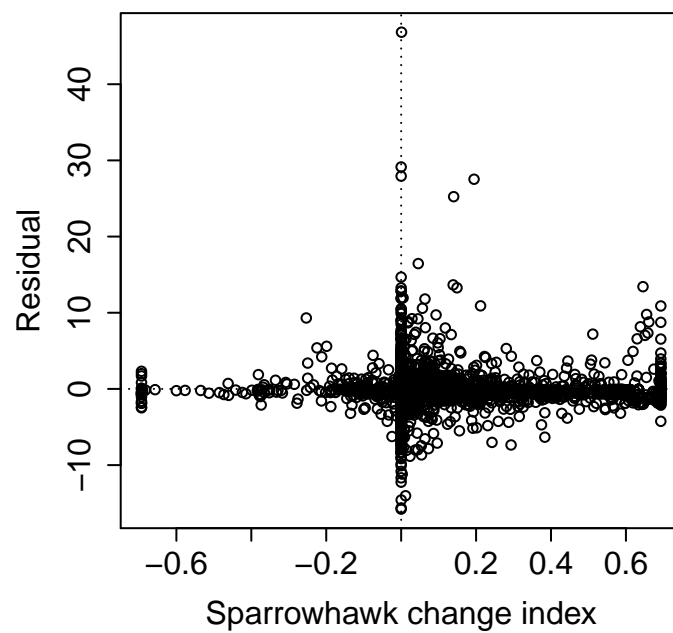

**Yellow Wagtail**

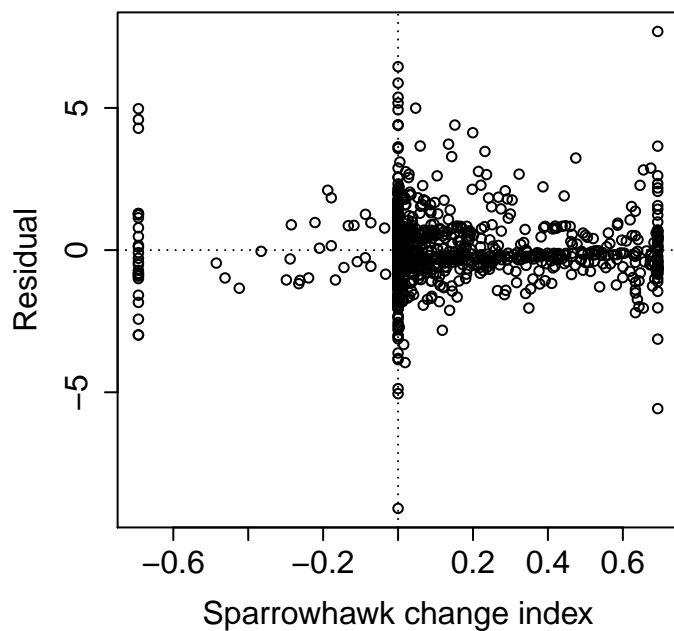

**Grey Wagtail**

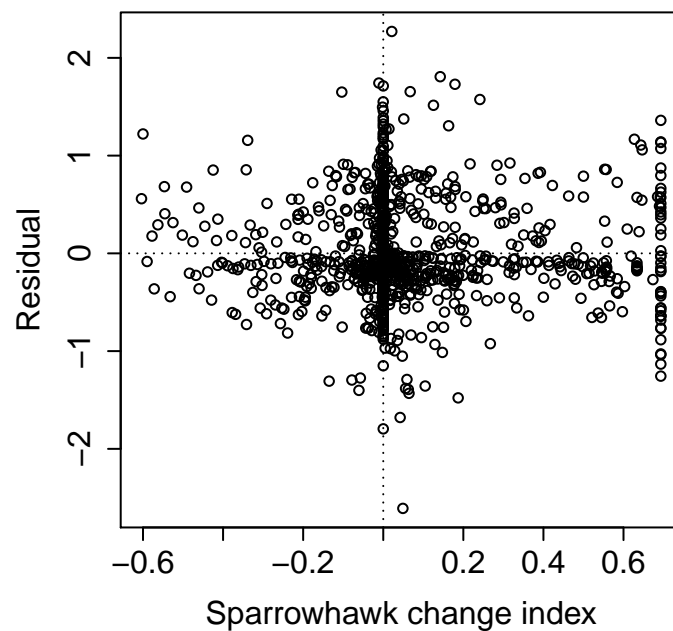

**Pied Wagtail**

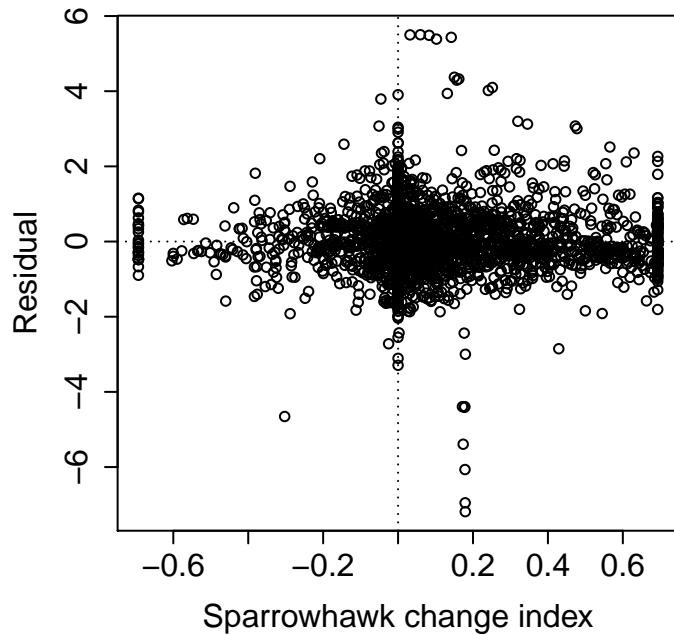

**Tree Pipit**

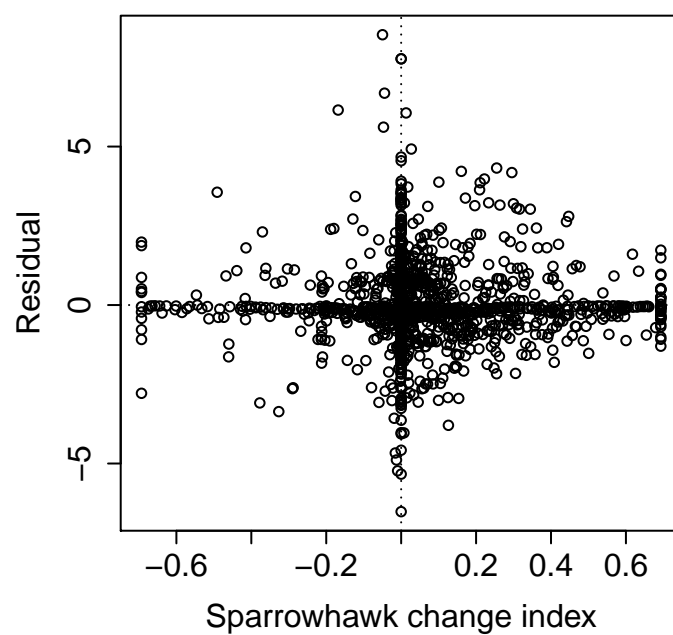

**Meadow Pipit**

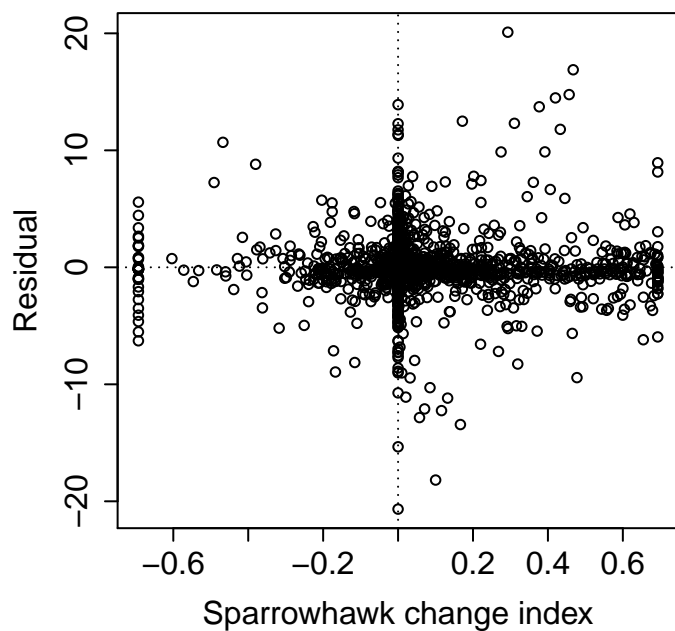

**Chaffinch**

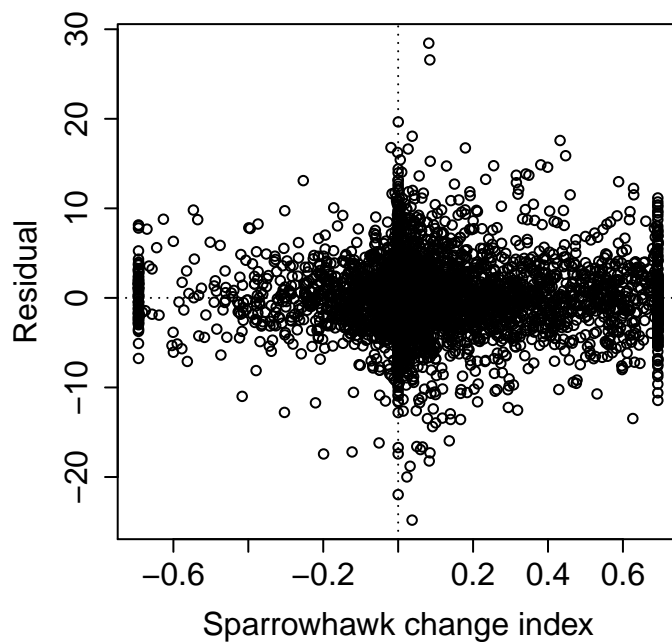

**Bullfinch**

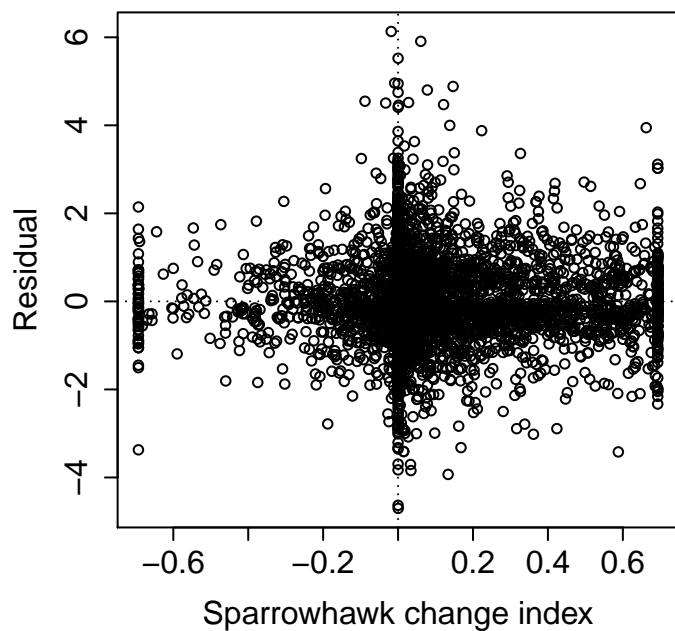

**Greenfinch**

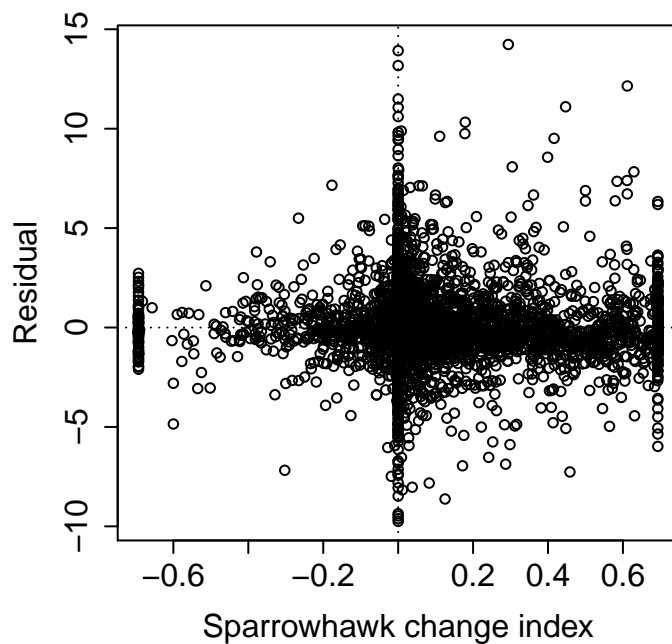

**Linnet**

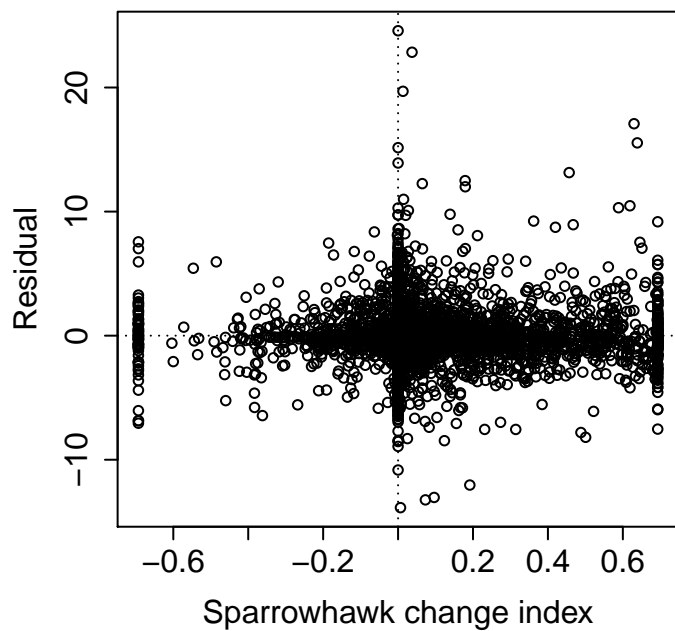

**Redpoll**

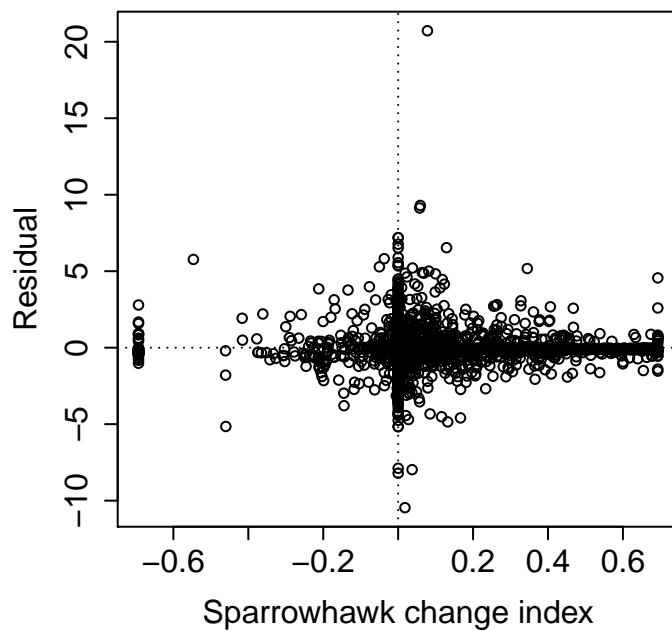

**Goldfinch**

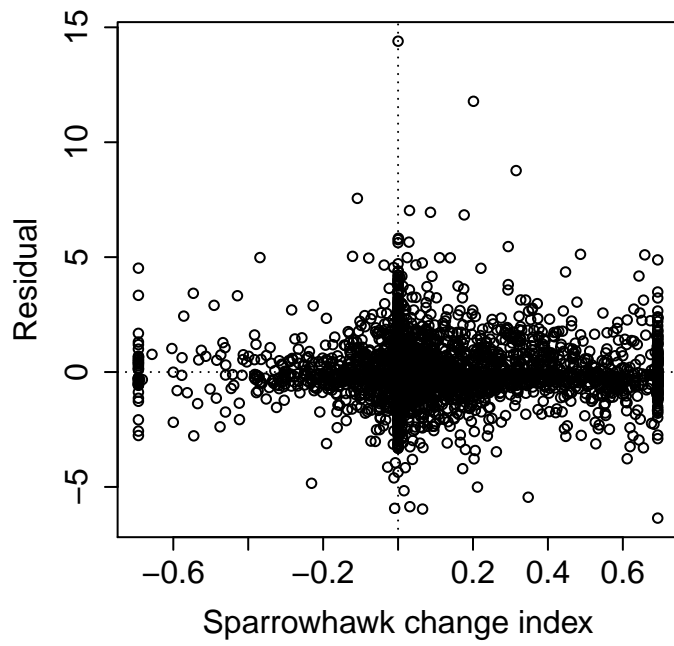

**Corn Bunting**

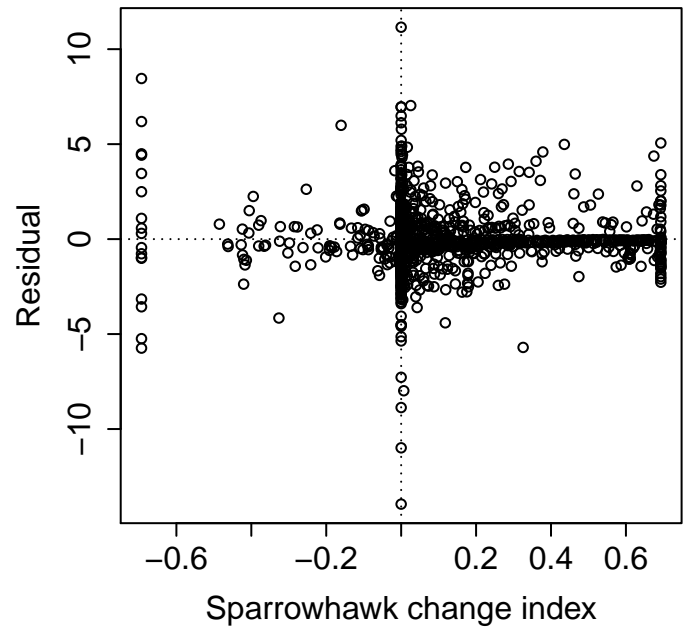

**Yellowhammer**

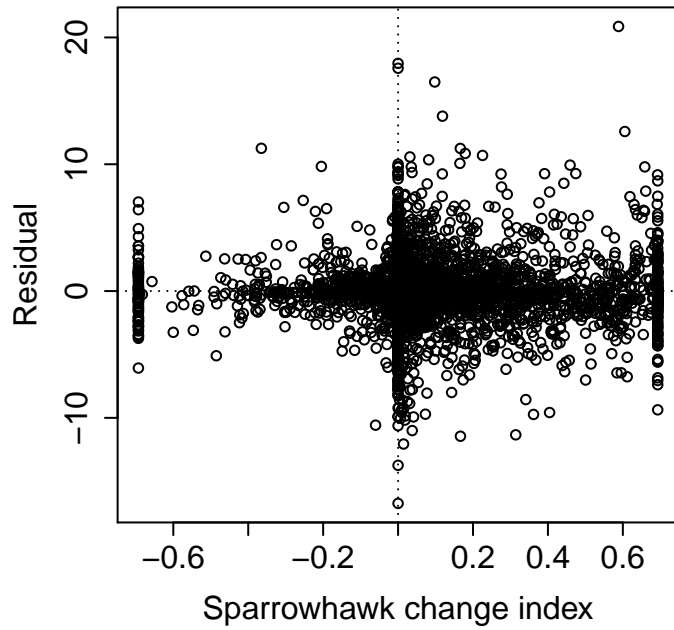

**Reed Bunting**

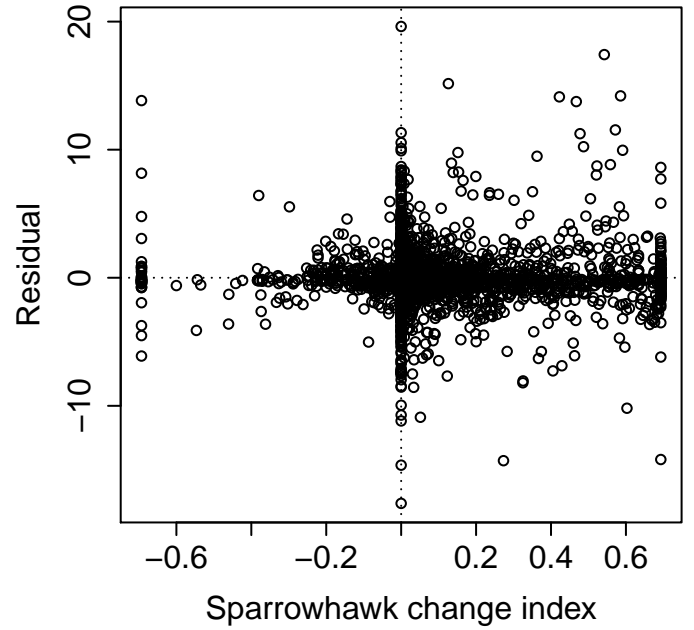

Supplement: Supplementary file 1 [file 24950381]
